# Supplementary material for: Phase transition behaviours of a single dendritic polymer
Source: Royal Society of Chemistry journal article supplement (doi:10.1039/c3sm53179a), 2014-01-01
Supplement: c3sm53179a1.pdf [file c3sm53179a1.pdf]

## Supplementary data for [Phase Transition Behaviours of a Single Dendritic Polymer]

Zilu Wang<sup>1,2</sup>, Long Wang<sup>1,2</sup>, Yu Chen<sup>2</sup> and Xuehao He<sup>\*2</sup>

<sup>1</sup> Department of Polymer Science and Engineering, School of Chemical Engineering and Technology, Tianjin University, 300072 Tianjin, China;

<sup>2</sup> Department of Chemistry, School of Science, Tianjin University, and Collaborative Innovation Center of Chemical Science and Engineering (Tianjin), 300072 Tianjin, China.

S1. Comparison of the average specific heat function  $C_V(T)/N$  for D/D polymer with different polymer size.

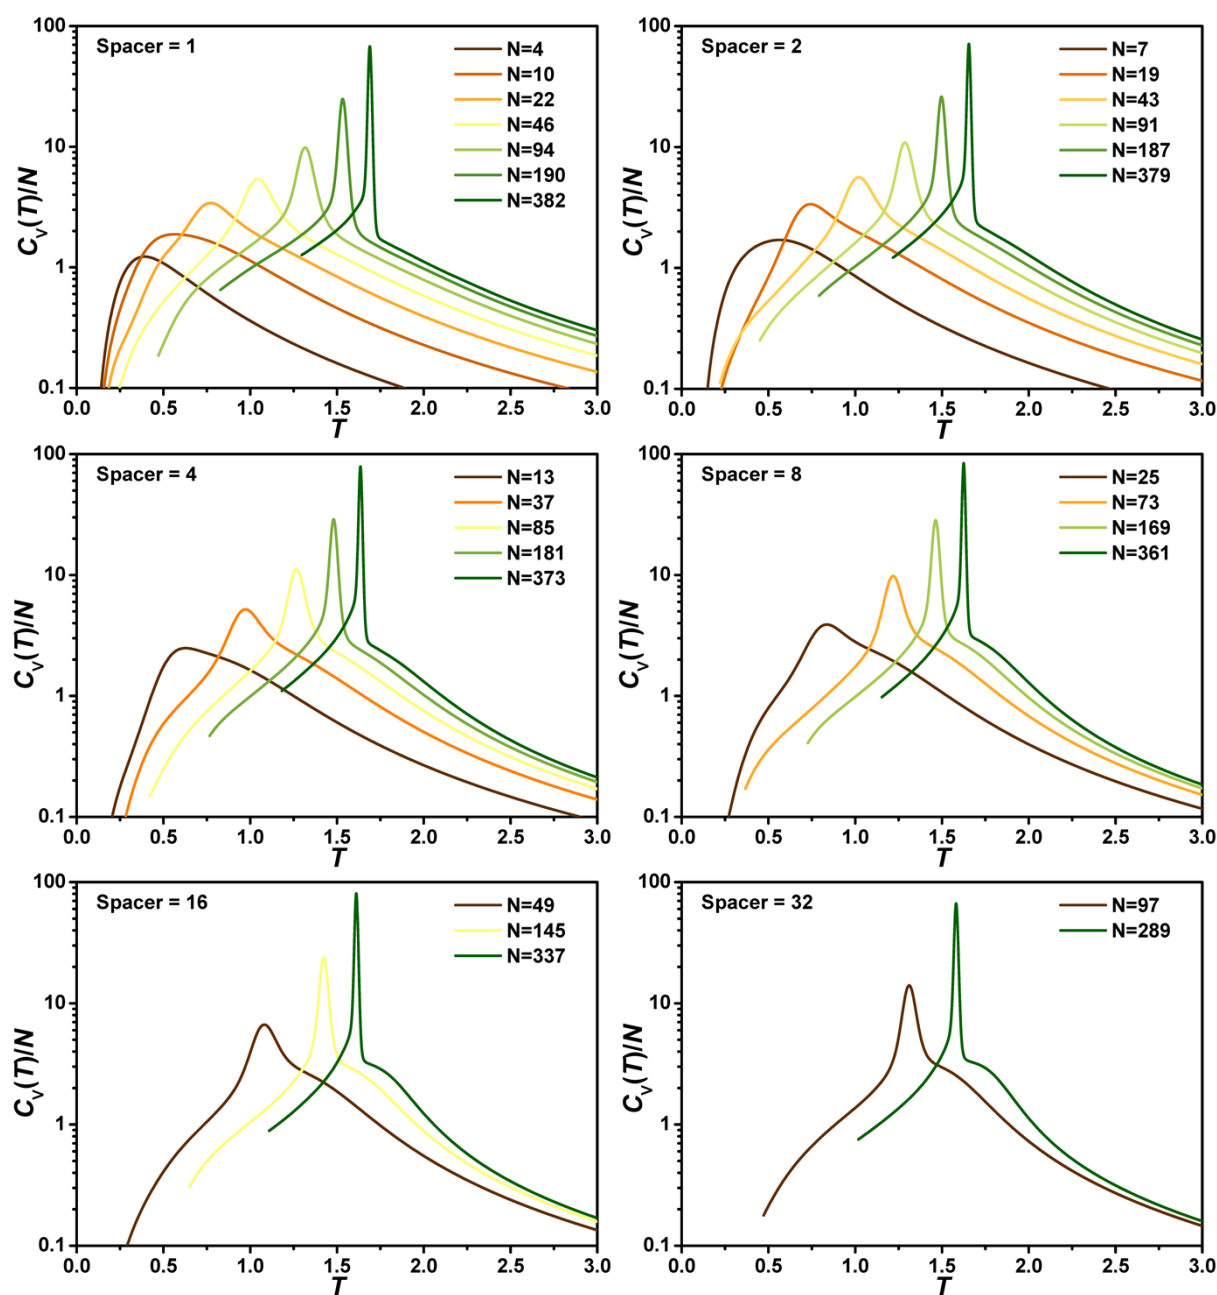

Fig. S1 Average specific heat function  $C_V(T)/N$  as a function of the reduced temperature for D/D polymers with different spacer lengths and sizes.
